# Supplementary figures and images for: The porcine circovirus type 1 capsid gene promoter improves antigen expression and immunogenicity in a HIV-1 plasmid vaccine
Source: Springer Nature journal article supplement (doi:10.1186/1743-422x-8-51), 2011-02-07

A

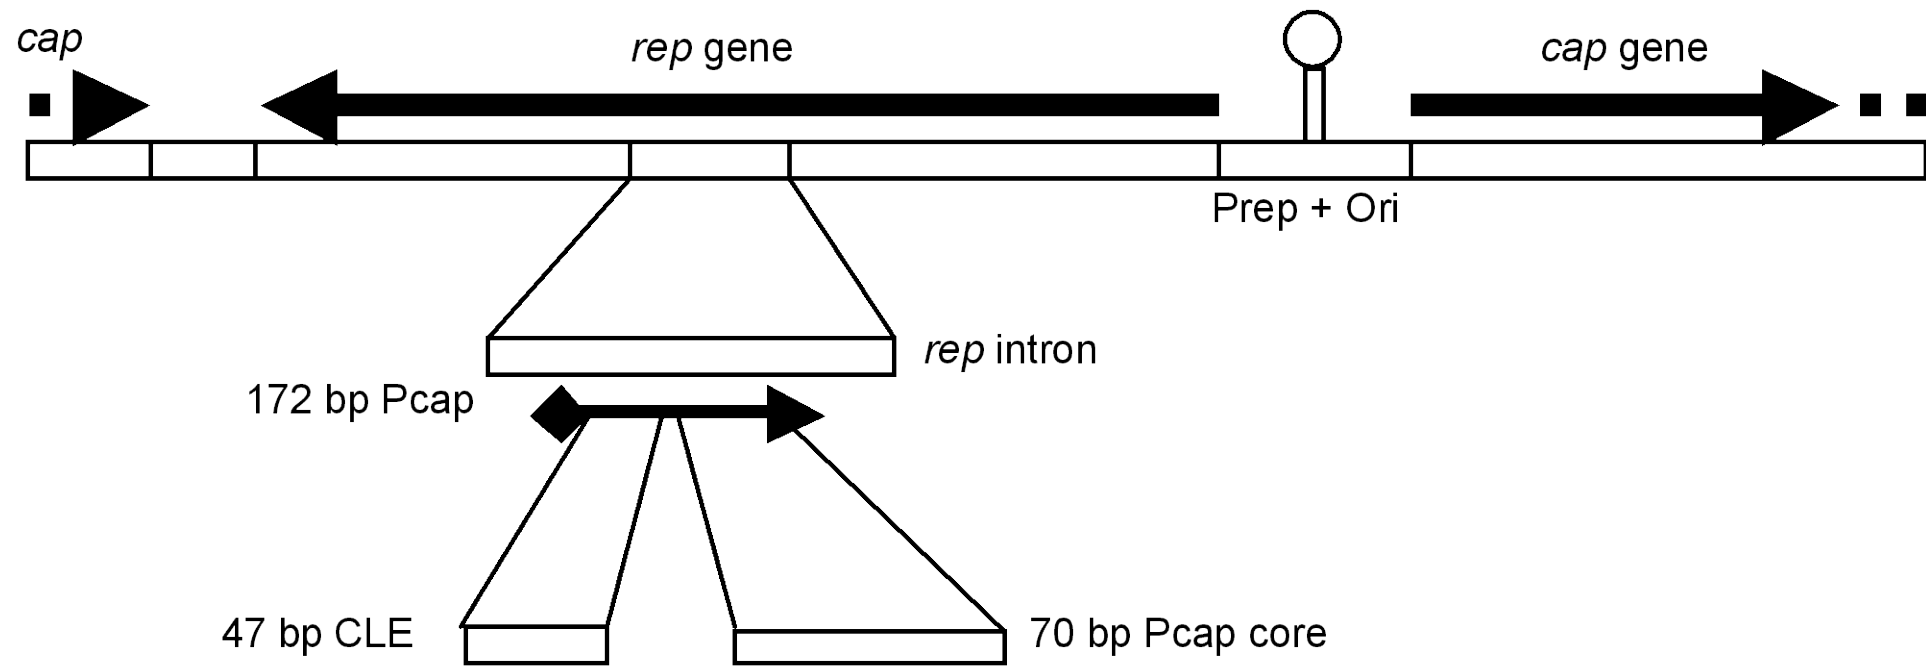

B

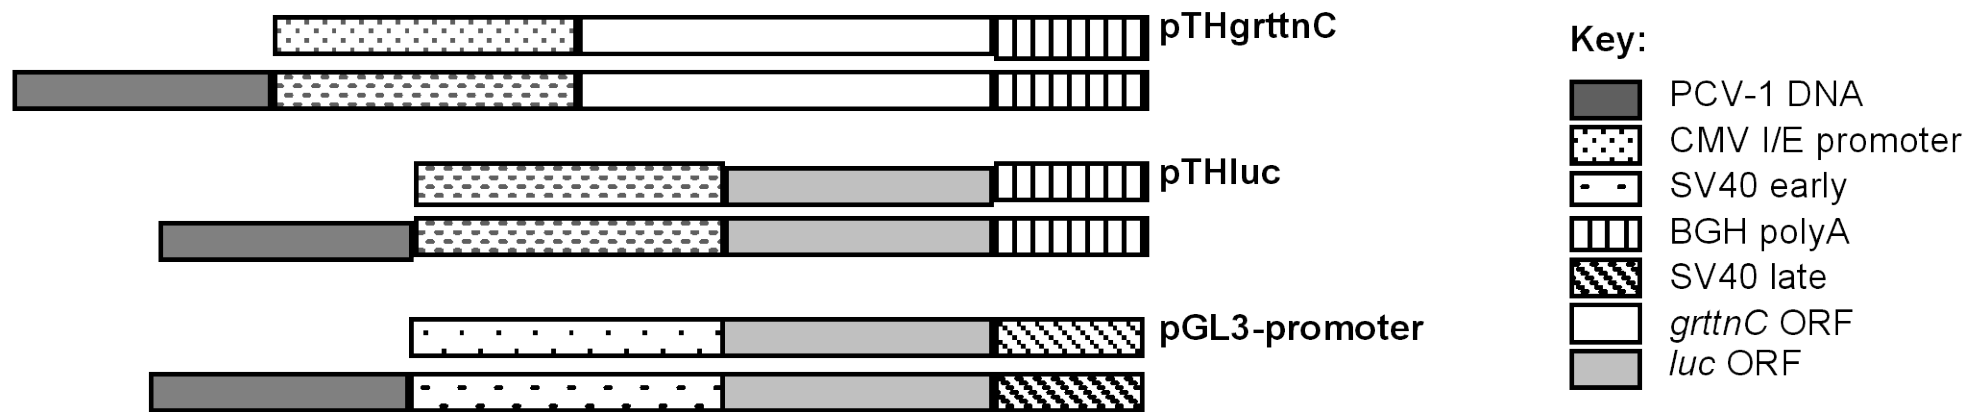

Supplement: 12985_2011_1499_MOESM2_ESM.pdf [file 12985_2011_1499_MOESM2_ESM.pdf]

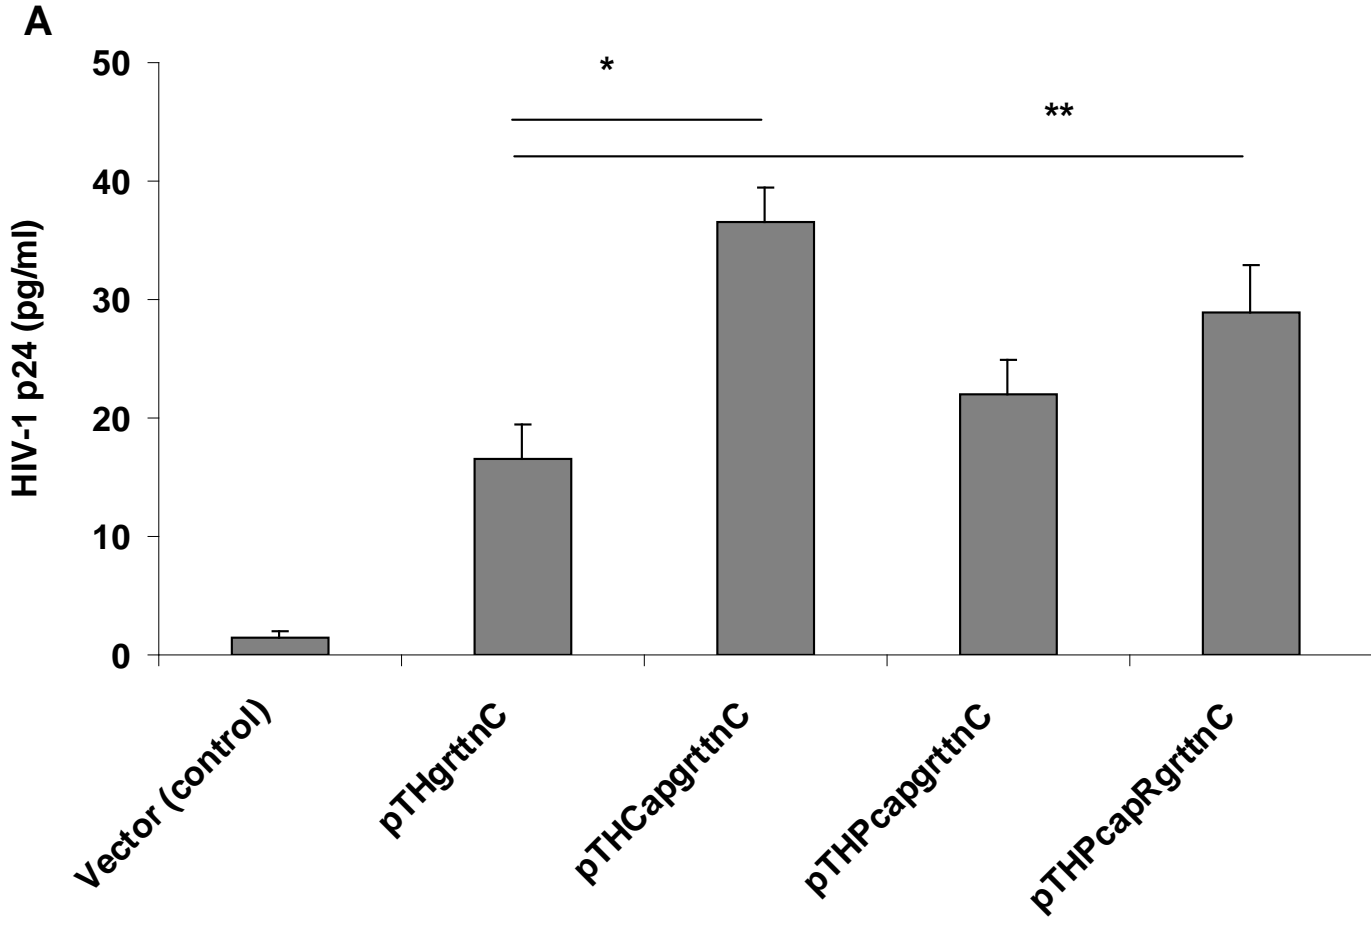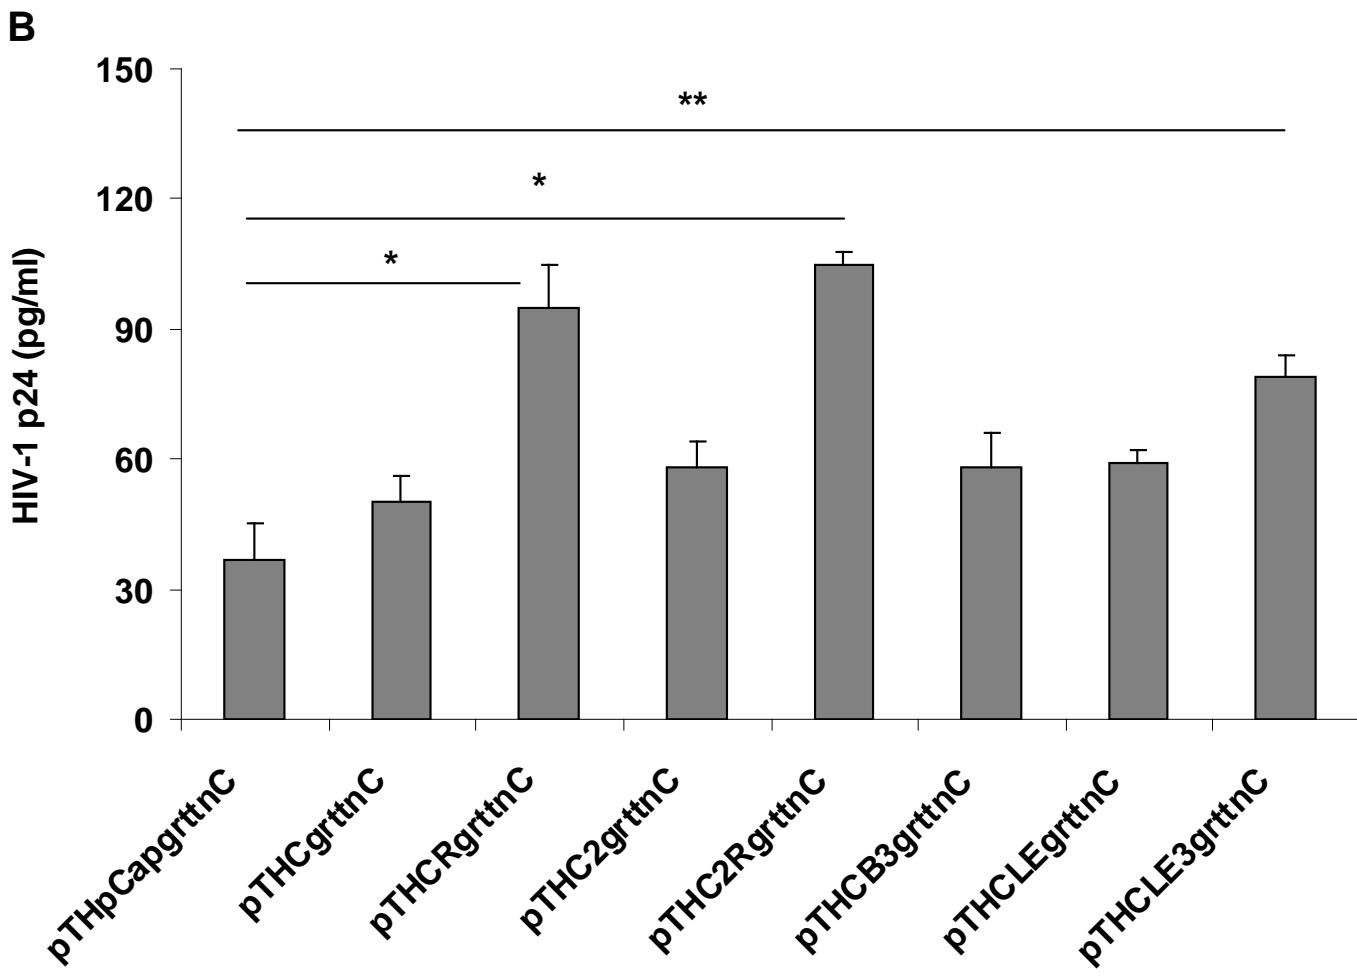

Supplement: 12985_2011_1499_MOESM4_ESM.pdf [file 12985_2011_1499_MOESM4_ESM.pdf]

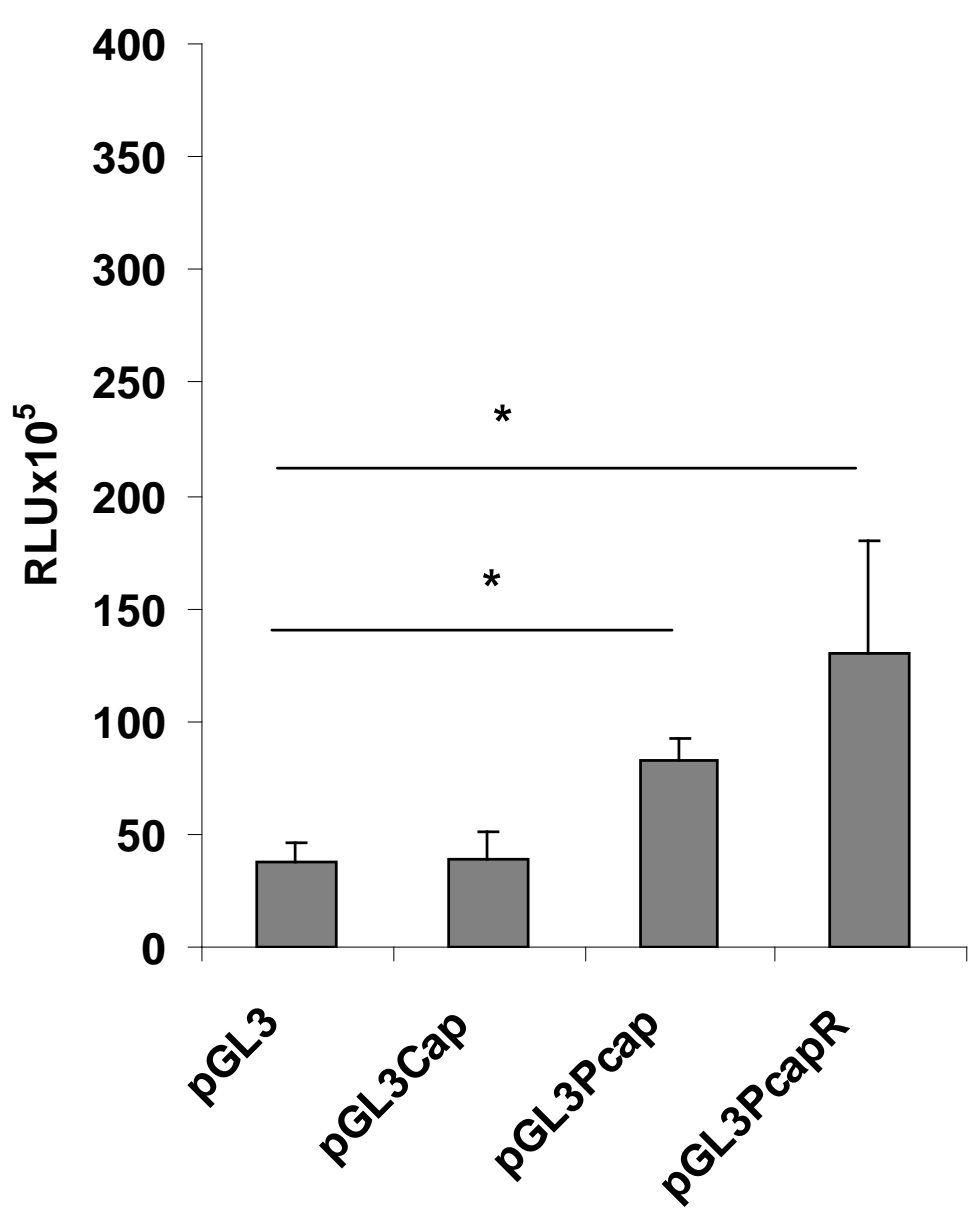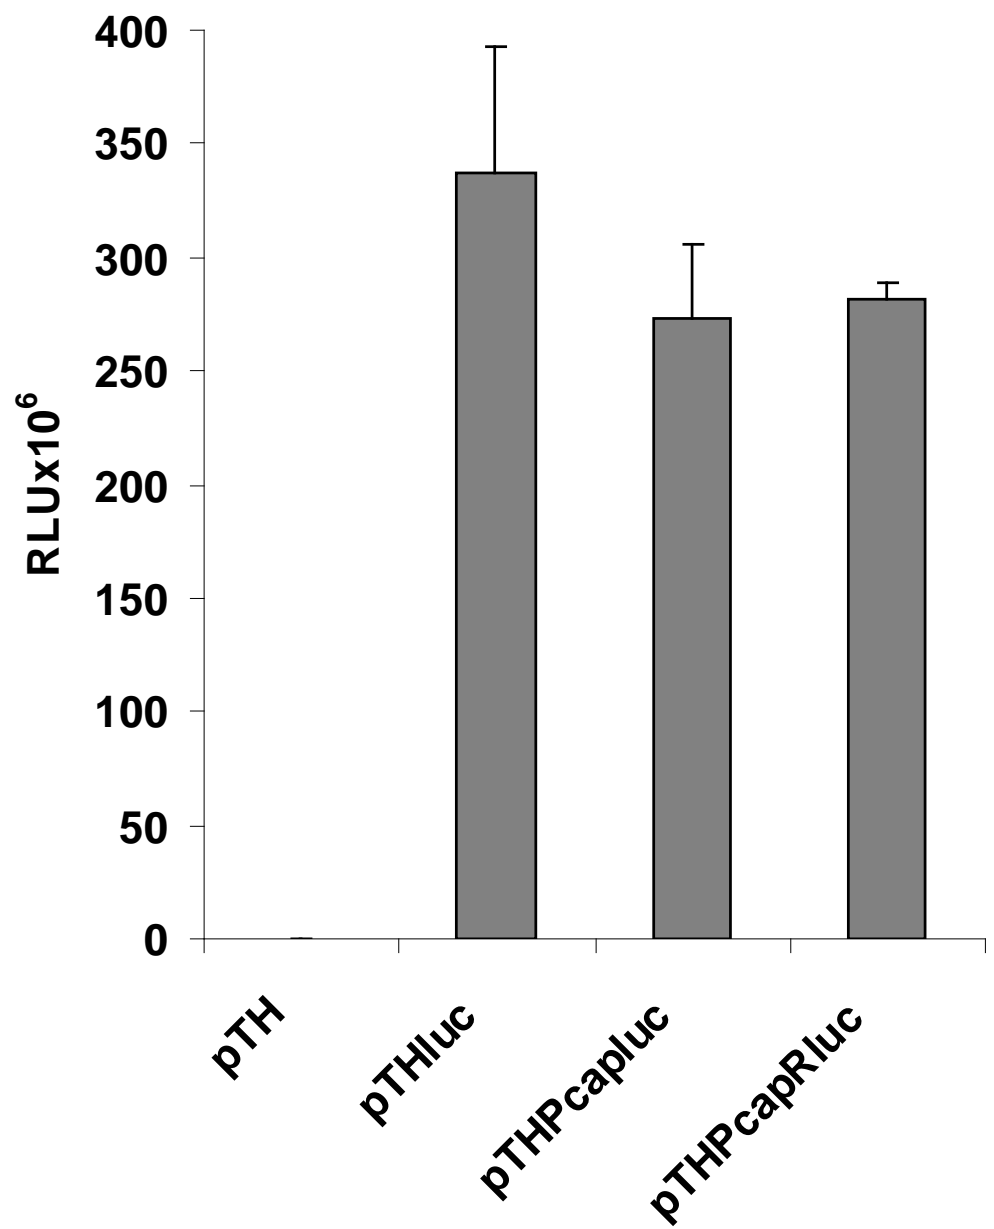

Supplement: 12985_2011_1499_MOESM5_ESM.pdf [file 12985_2011_1499_MOESM5_ESM.pdf]

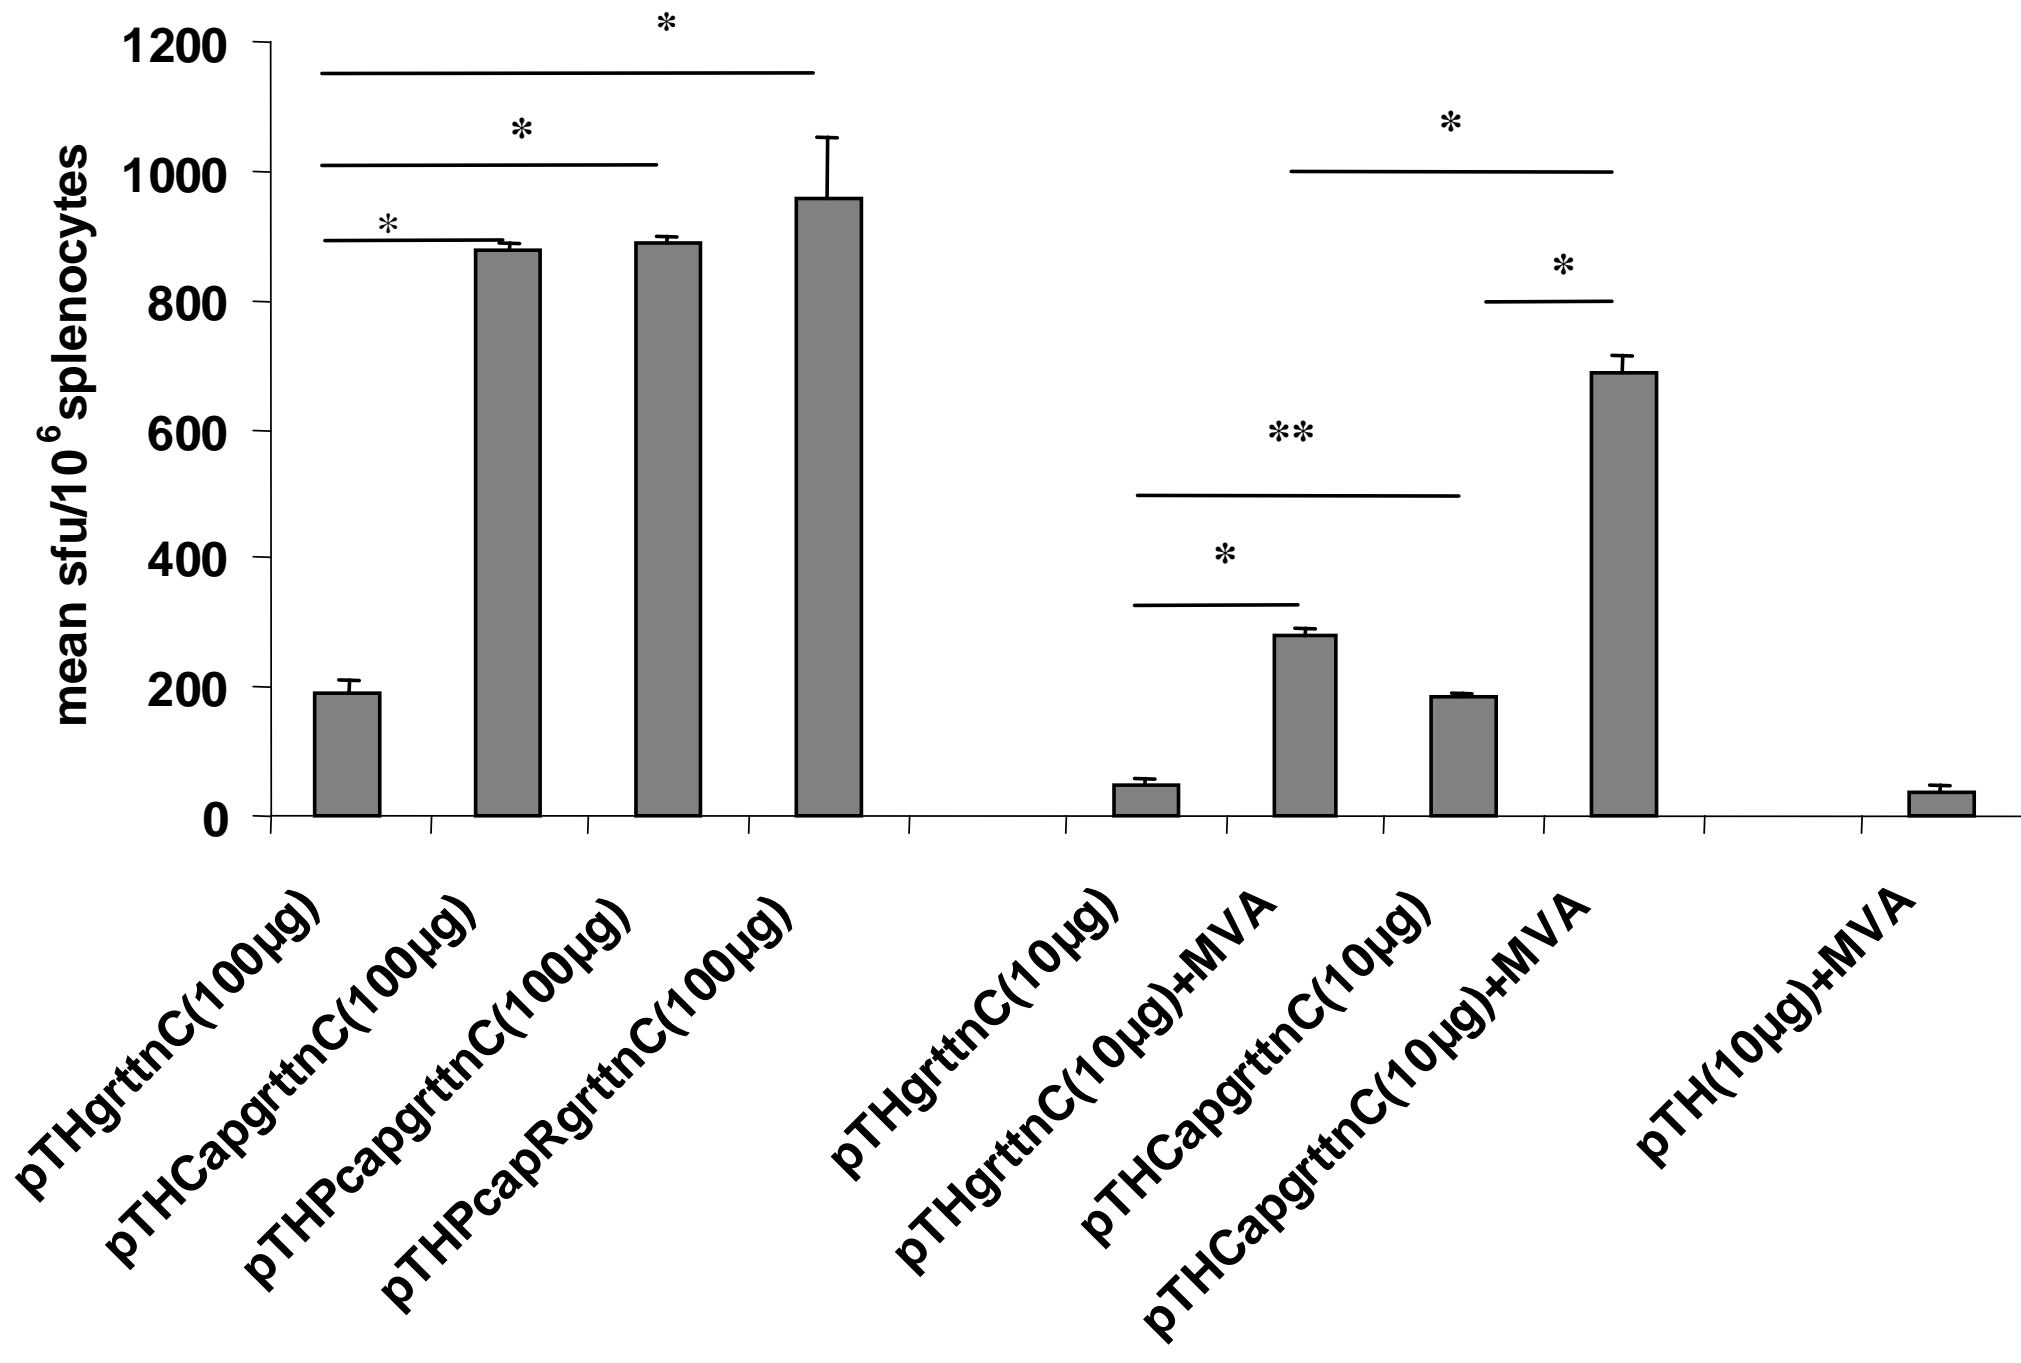

Supplement: 12985_2011_1499_MOESM6_ESM.pdf [file 12985_2011_1499_MOESM6_ESM.pdf]
